# Supplementary material
Source: publisher site journal article supplement (https://www.dovepress.com/article/311813)
Supplement: Supplementary file 1 [file get_supplementary_file.php]

**Appendix A**

This appendix provides a short introduction to the indices used in the study. There are many good texts that present detailed examinations of the individual types of indices including the technical properties (see e.g. (1, 2)). There are also a few texts discussing the different types of indices from the point of view of policy (3-6). For the present context of socioeconomic position-related inequality in health, all indices are constructed from two measures: socioeconomic position (hereafter we refer to income for simplicity) and health, whether measured as ill health or good health.

*Concentration indices*

Concentration indices quantify the inequality in one variable over the distribution of another, e.g., whether good health is concentrated in the poor or rich end of the income distribution. Concentration indices were first used in economics where they were used to analyse tax progressivity (7) but over the past couple of decades application has emerged to health (8). There are many variants of the concentration index whose relevance depends on the scale of the inequality measure (e.g. dichotomous or continuous, bounded or unbounded etc.) and the more ideological stand on what inequality is (e.g. absolute versus relative goals) (9).

When the cumulative proportion of health is plotted against the cumulative proportion of the population ranked by income, the 45° line represents income-related health equality. Any deviation from the 45° line represents inequality, whether the concentration curve lies above (health is concentrated on higher income individuals) or below (health is concentrated on lower income individuals).

The formal definition of the standard concentration index is

where is health, is the ranking measure of income resulting in the ranking across individuals, and is covariance. The concentration index ranges from (all health is concentrated on the poorest individual) to (all health is concentrated on the richest individual) (10). Estimation commands has become standard in conventional software such as Stata.

*Slope and relative index of inequality*

The SII and the RII quantify the absolute and the relative health inequality, respectively, in a population. Both the SII and the RII are estimated using a linear regression and they reflect the distribution across the entire population studied (1, 11). Similar to the concentration indices the population is ranked according to their income. The direction of the rank is determined by the studied exposure as the standard is to rank the population from the worst situation (ie the lowest income) to the best situation (the highest income) (12).

The SII is estimated as the gap between the health of the hypothetically worst off and the hypothetically best off individual in a population. The formal definition of the SII is thus the difference between the regression-based extremes (2):

Where *f(X)* is the estimated health and 1 and 0 the position of the most and least privileged respectively (13). When the outcome is undesirable (ill health) the SII would reflect the excess risk from being exposed (to the lowest income) (13).

The relative counterpart to the SII is the RII which, based on the same regression, is the ratio between the extremes:

Parallel to the SII, the RII can be interpreted as analogous to the relative risk (2, 3). The size and sign of both the SII and RII are not confined within a fixed range but are determined by the range and definition of health/ill health.

**References**

1. Wagstaff A, Paci P, Doorslaer EV. On the measurement of inequalities in health. Social Science & Medicine1991. p. 545-57.

2. Mackenbach JP, Kunst AE. Measuring the magnitude of socio-economic inequalities in health: An overview of available measures illustrated with two examples from Europe. Social Science and Medicine1997. p. 757-71.

3. Low A, Low A. Measuring the gap: Quantifying and comparing local health inequalities. Journal of Public Health2004. p. 388-95.

4. Asada Y. On the Choice of Absolute or Relative Inequality Measures. The Milbank quarterly2010. p. 616-22.

5. Kjellsson G, Gerdtham U-g, Petrie D. Lies, Damned Lies, and Health Inequality Measurements. Epidemiology2015. p. 673-80.

6. Harper SAM, King NB, Stephen C, Reichman ME, Western C, Cancer N. Implicit Value Judgments in the Measurement of Health Inequalities. Milbank quarterly. 2010;88(1):4-29.

7. Kakwani NC. Measurement of Tax Progressivity: An International Comparison. Economic Journal. 1977;87(345):71-80.

8. O'Donnell O, van Doorslaer E, Wagstaff A, Lindelow M. Analyzing Health Equity Using Household Survey Data. Washington, DC: World Bank Institute; 2008.

9. Erreygers G, Ourti TV. Measuring socioeconomic inequality in health , health care and health financing by means of rank-dependent indices : A recipe for good practice. Journal of Health Economics: Elsevier B.V.; 2011. p. 685-94.

10. O’Donnell O, O’Neill S, Van Ourti T, Walsh B. conindex: Estimation of concentration indices. Stata Journal2016. p. 112-38.

11. Khang Y-h, Lim D, Kang H-y, Chang Y, Bahk J, Kim I, et al. A publicly well-accepted measure versus an academically desirable measure of health inequality : cross- sectional comparison of the difference between income quintiles with the slope index of inequality. 2019. p. 1-7.

12. Pamuk ER. Social Class Inequality in Mortality from 1921 to 1972 in England and Wales. Population Studies. 1985;39(1):17-31.

13. Moreno-Betancur M, Latouche A, Menvielle G, Kunst AE, Rey G. Relative Index of Inequality and Slope Index of Inequality A Structured Regression Framework for Estimation. Epidemiology2015. p. 518-27.

**Appendix B**

**Quality of care measures**

| - Ischemic stroke patient without atrial fibrillation receives platelet-inhibitor therapy within 2 days of admission |
| --- |
| - Ischemic stroke patient with atrial fibrillation receives oral anticoagulation therapy within 14 days after admission |
| - Stroke patient is examined with a CT/MRI scan on the day of admission |
| - Stroke patient is assessed by a physiotherapist about the need for rehabilitation (including type and extent) within the second day of admission |
| - Stroke patient is assessed by an occupational therapist about the need for rehabilitation (including type and extent) within the second day of admission |
| - Stroke patient is mobilized on the day of admission |
| - Stroke patient receives a nutritional risk assessment within the second day of admission |
| - Stroke patient is admitted to a stroke unit within the second day of admission |
| - Ischemic stroke patient is examined with ultrasound or CT/MR angiography of the carotid arteries within 4 days of admission |
| - Stroke patient is admitted to a hospital within 3 hours after symptom onset |
| - Stroke patient is admitted to a hospital within 4.5 hours of symptom onset |
| - Stroke patient receives indirect swallowing test on the day of admission before receiving food or fluids to assess swallowing function and risk of aspiration |
| - Stroke patient receives direct swallowing test on the day of admission before receiving food or fluids to assess swallowing function and risk of aspiration |
| - Ischemic stroke patient undergoes carotid endarterectomy within 14 days of admission |
| - Stroke patient is treated with thrombolysis and has a door-to-needle time of ≤1 h |
| - Ischemic stroke patient receives thrombolysis |

Note: These measures have been presented in an earlier publication, see Hyldgård et. al, 2019
